# Supplementary material for: Retinoic acid-induced upregulation of miR-219 promotes the differentiation of embryonic stem cells into neural cells
Source: PubMed Central journal article supplement (PMC5550877; doi:10.1038/cddis.2017.336), 2017-07-27
Supplement: cddis2017336x1.pdf [file cddis2017336x1.pdf]

## Supplementary Materials

**Title:** Retinoic acid-induced upregulation of miR-219 promotes the differentiation of embryonic stem cells into neural cells

**Authors:** Haibo Wu<sup>1,2,\*</sup>, Jiamin Zhao<sup>1,2</sup>, Beibei Fu<sup>1,2</sup>, Songna Yin<sup>2</sup>, Chao Song<sup>1,2</sup>, Jingcheng Zhang<sup>1,2</sup>, Shanting Zhao<sup>1</sup> and Yong Zhang<sup>1,2,\*</sup>

<sup>1</sup>College of Veterinary Medicine, Northwest A&F University, Yangling 712100, Shaanxi, China

<sup>2</sup>Key Laboratory of Animal Biotechnology, Ministry of Agriculture, Northwest A&F University, Yangling 712100, Shaanxi, China

\*Corresponding author

**Contact:** hbwu029@nwsuaf.edu.cn (H.W) or zhangy1956@sina.com (Y.Z)

**Running title:** MiR-219 promotes neural differentiation

**Keywords:** Differentiation; Embryonic stem cells; MicroRNA; Co-expression network

**Contain:** Supplementary Figures S1-S8; Supplementary Tables S1-S7

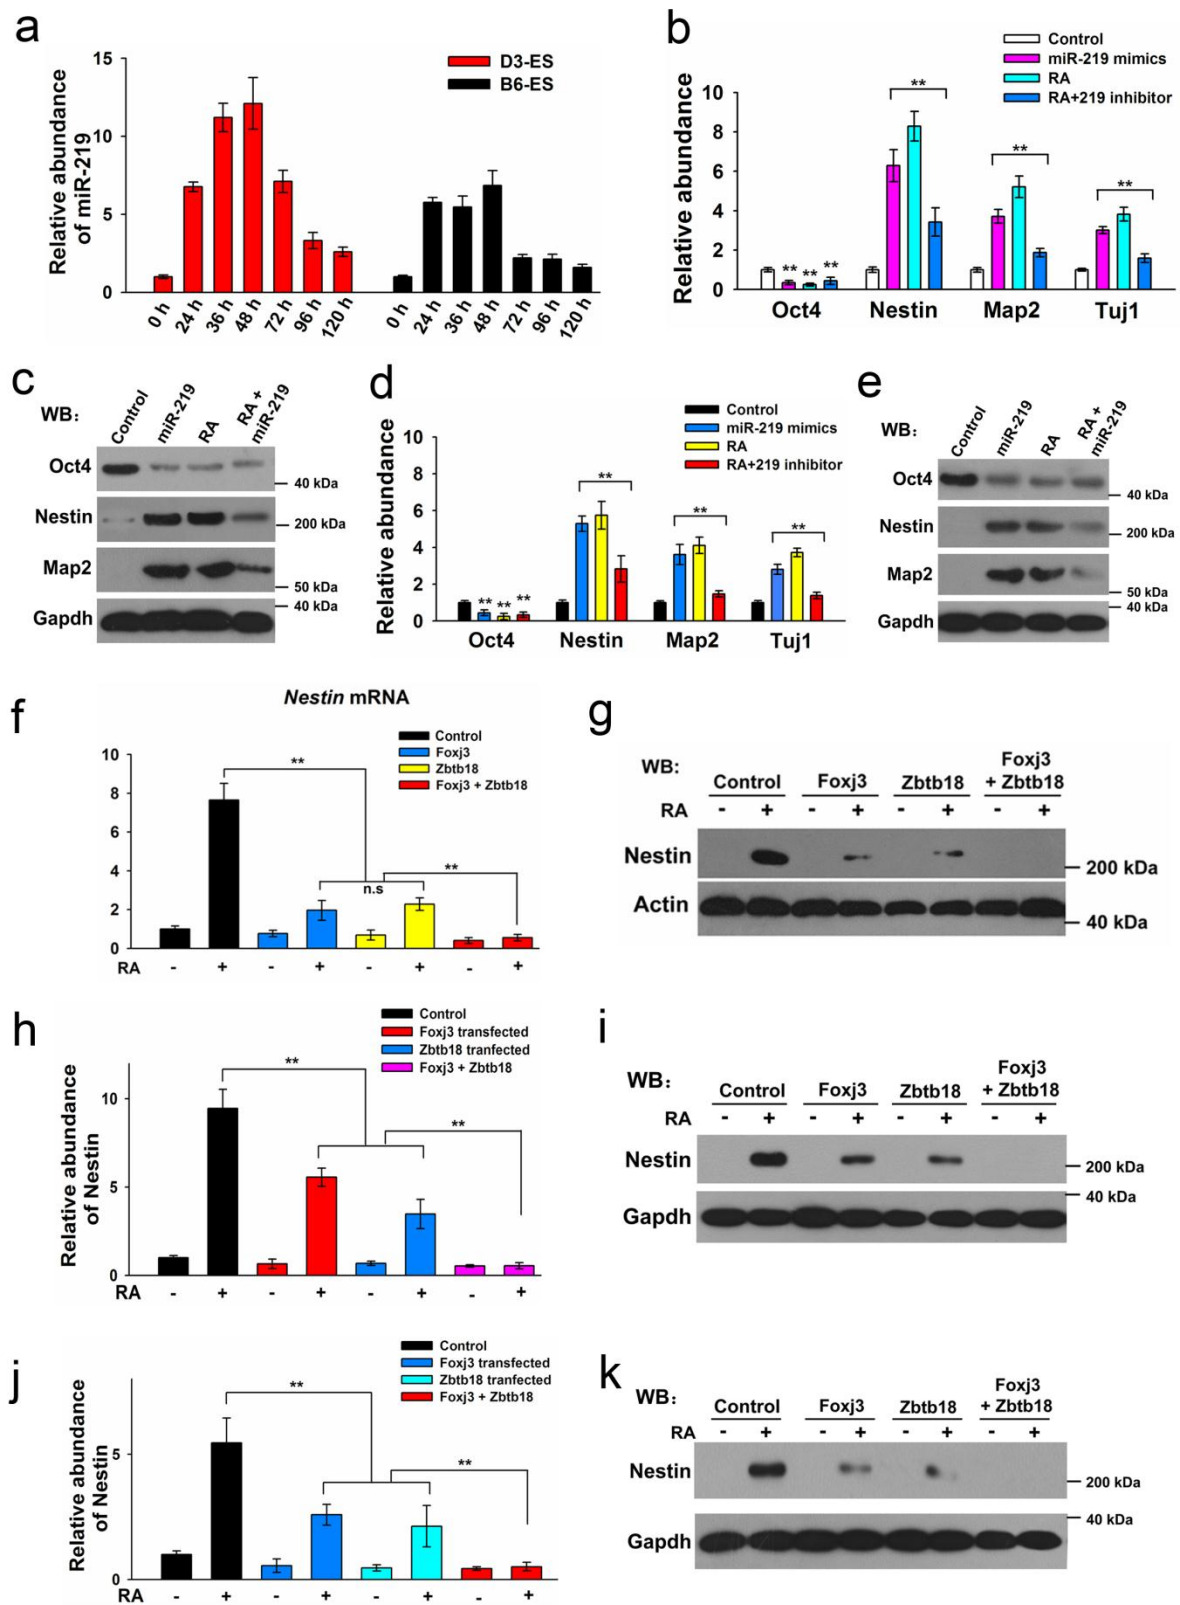

**Fig. S1 MiR-219-mediated neural differentiation is conserved in D3 and B6 mESCs.** (A): Relative expression levels of miR-219 at different time points after RA treatment in D3 and B6 mESCs. (B–E): D3 ESCs (B, C) or B6 ESCs (D, E) were treated with RA and transfected with miR-219 mimics or miR-219 inhibitors for 48 h.

Relative levels of *Oct4*, *Nestin*, *Map2*, and *Tuj1* were detected through qRT-PCR (B, D) and Western blot (C, E). (F–K): J1 ESCs (F, G), D3 ESCs (H, I) or B6 ESCs (J, K) were pretreated with RA for 24 h and transfected with pCMV- Foxj3 or pCMV- Zbtb18. Relative level of *Nestin* was detected through qPCR (F, H, J) and Western blot (G, I, K). Gapdh served as the loading control. \*\*:  $P < 0.01$ .

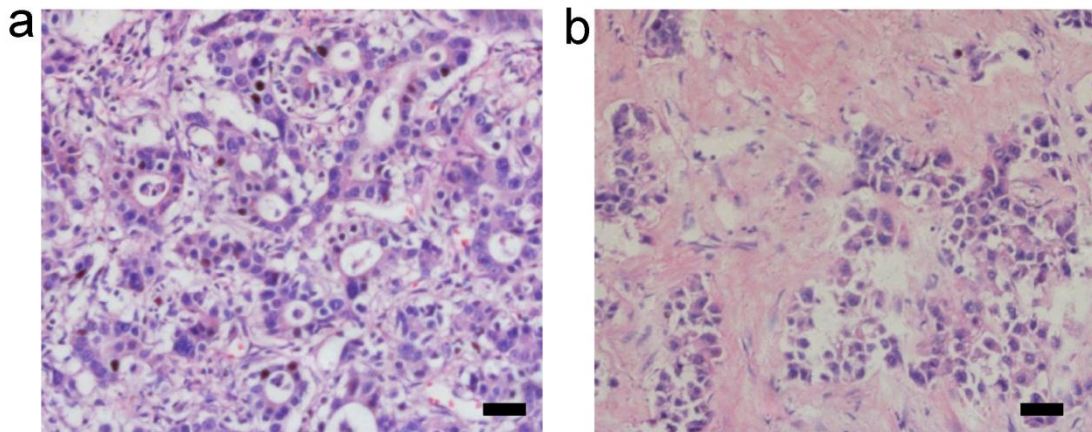

**Fig. S2 Representative neural like tissues derived from RA pretreated ESCs (a) and RA pretreated Foxj3/Zbtb18-ESCs (b). Scale bars: 100  $\mu$ m.**

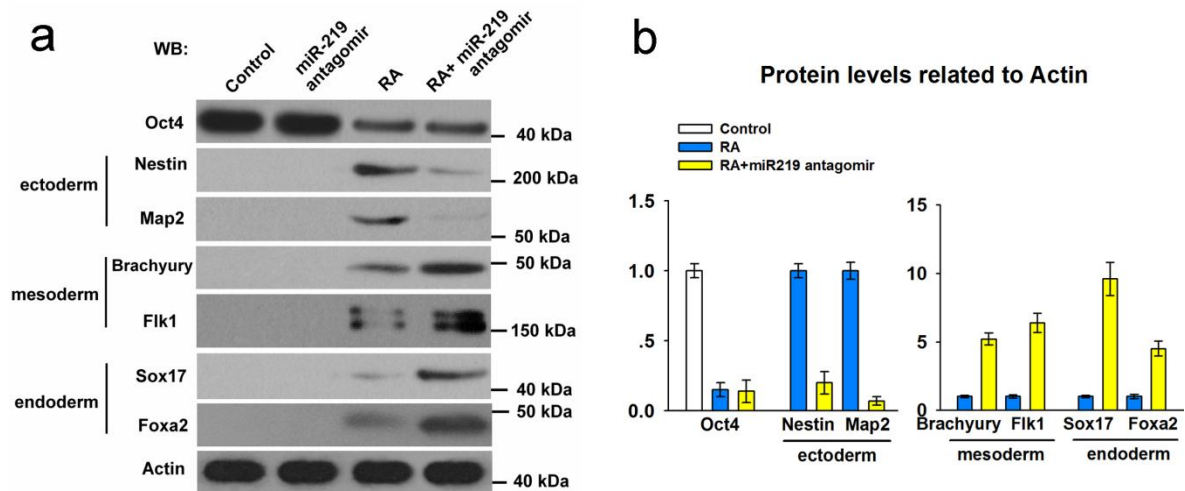

**Fig. S3 RA-induced ESCs tend to differentiate into mesodermal and endodermal cells upon miR-219 inhibition.** (A): ESCs were treated with RA or miR-219 antagonists for 48 h. Western blot was performed to detect the expression levels of ectoderm- (Nestin, Map2), mesoderm- (Brachyury, Flk1), and endoderm- (Sox17, Foxa2) specific markers. (B): Relative intensities of the protein bands were quantified with Image J software and calculated by using the samples normalized to  $\beta$ -actin. All data are presented as mean  $\pm$ SD and derived from three independent experiments.

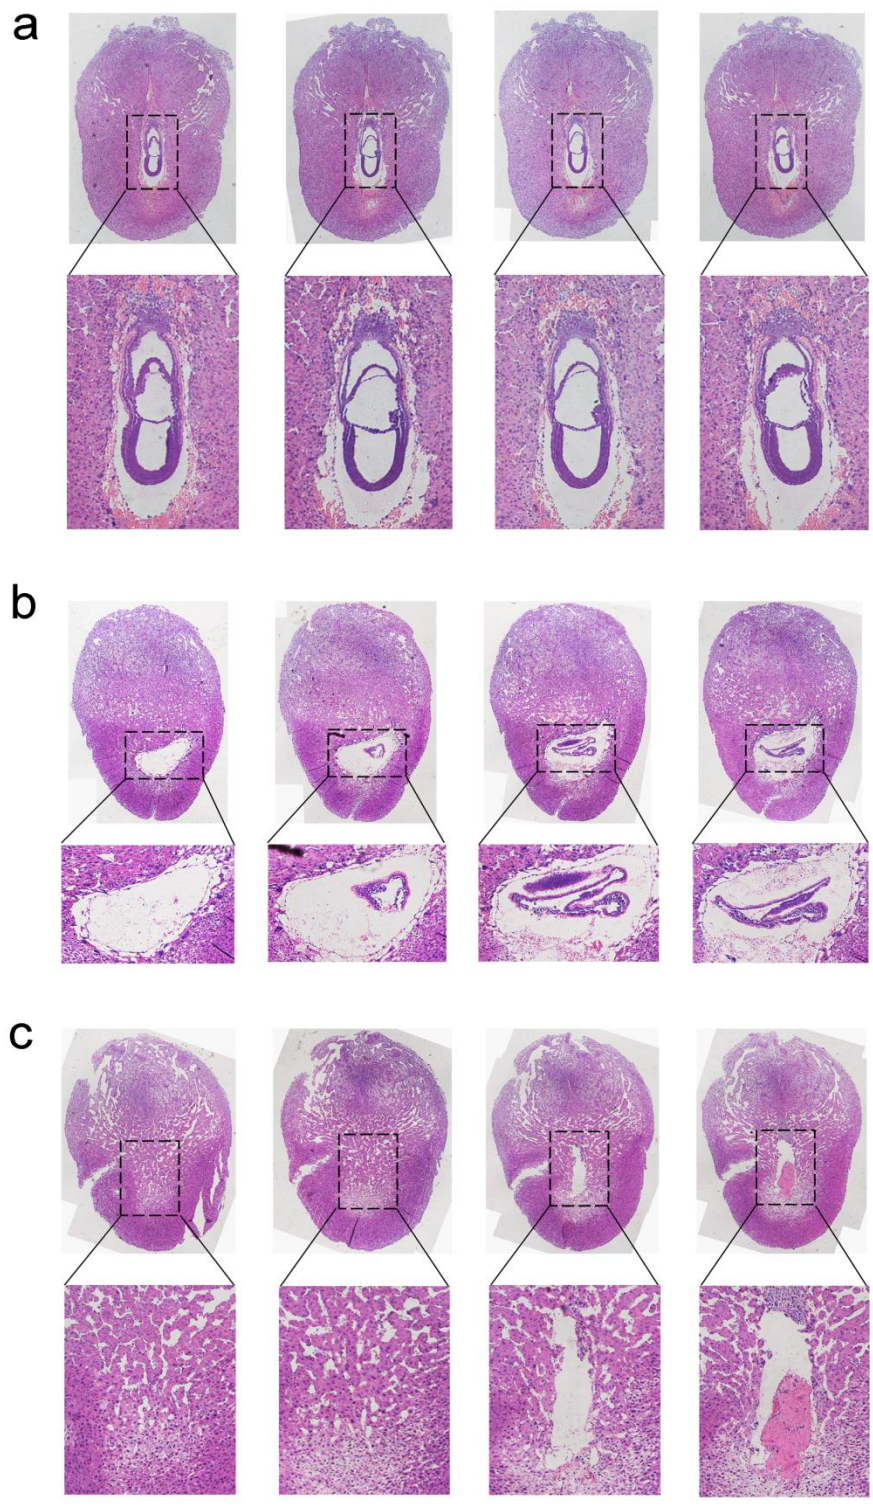

**Fig. S4 Representative images of serially sectioned abnormal embryos. (A):** Normal E7.5 embryos injected with control mRNA transcribed from empty vectors. (B, C): Representative abnormal E7.5 embryos injected with *Foxj3/Zbtb18* mRNAs. (B) shows the quick degeneration and displays an abnormal phenotype of the embryonic zone. (C) shows apparent resorption and a trace of residual pyknotic tissue.

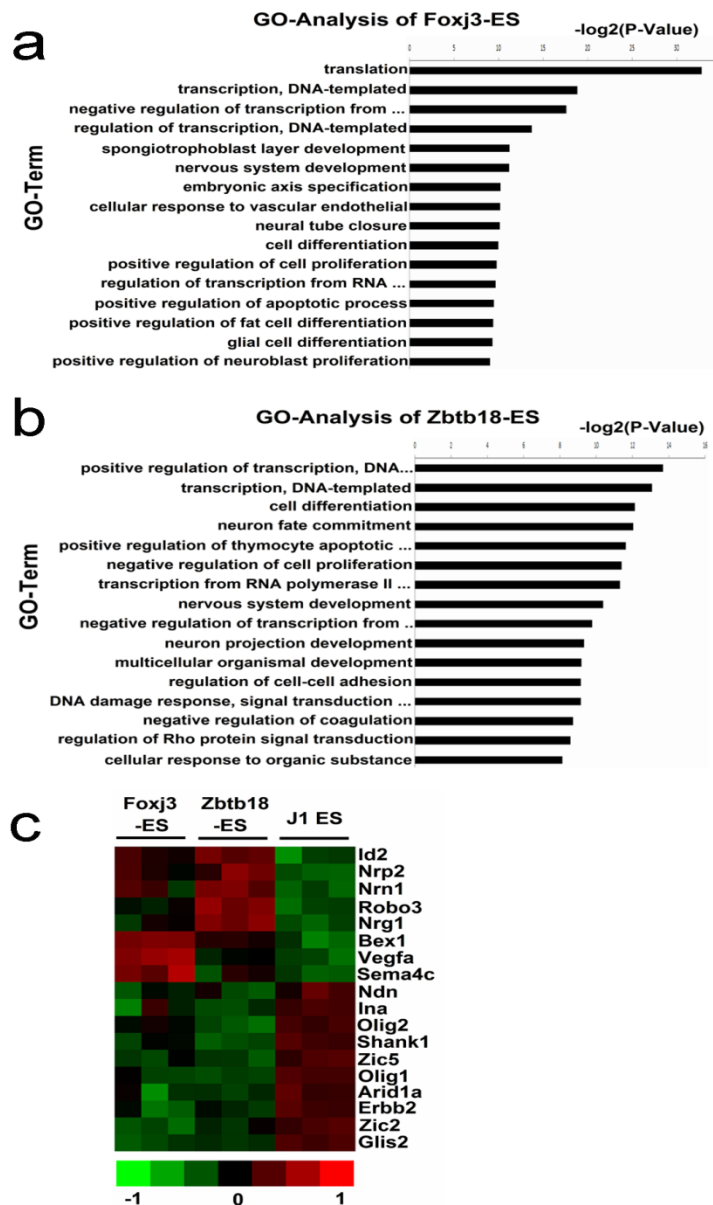

**Fig. S5 Top-ranking GO terms and involved genes.** (A, B): Top-ranking GO terms are listed according to  $P$  values. Five GO terms, involved in nervous system development, embryonic axis specification, neural tube closure, glial cell differentiation, and positive regulation of neuroblast proliferation, were significantly enriched ( $P < 0.05$ ) in Foxj3-ESCs (A). Similarly, four GO terms, involved in neuron fate commitment, nervous system development, neuron projection development, and regulation of Rho protein signal transduction, were significantly enriched ( $P < 0.05$ ) in Zbtb18-ESCs (B). (C): Heat map representation of the selected genes involved in nervous system development, central nervous system development, neuron fate commitment, and forebrain development. Gene expression is shown with pseudocolor scale (-1 to 1).

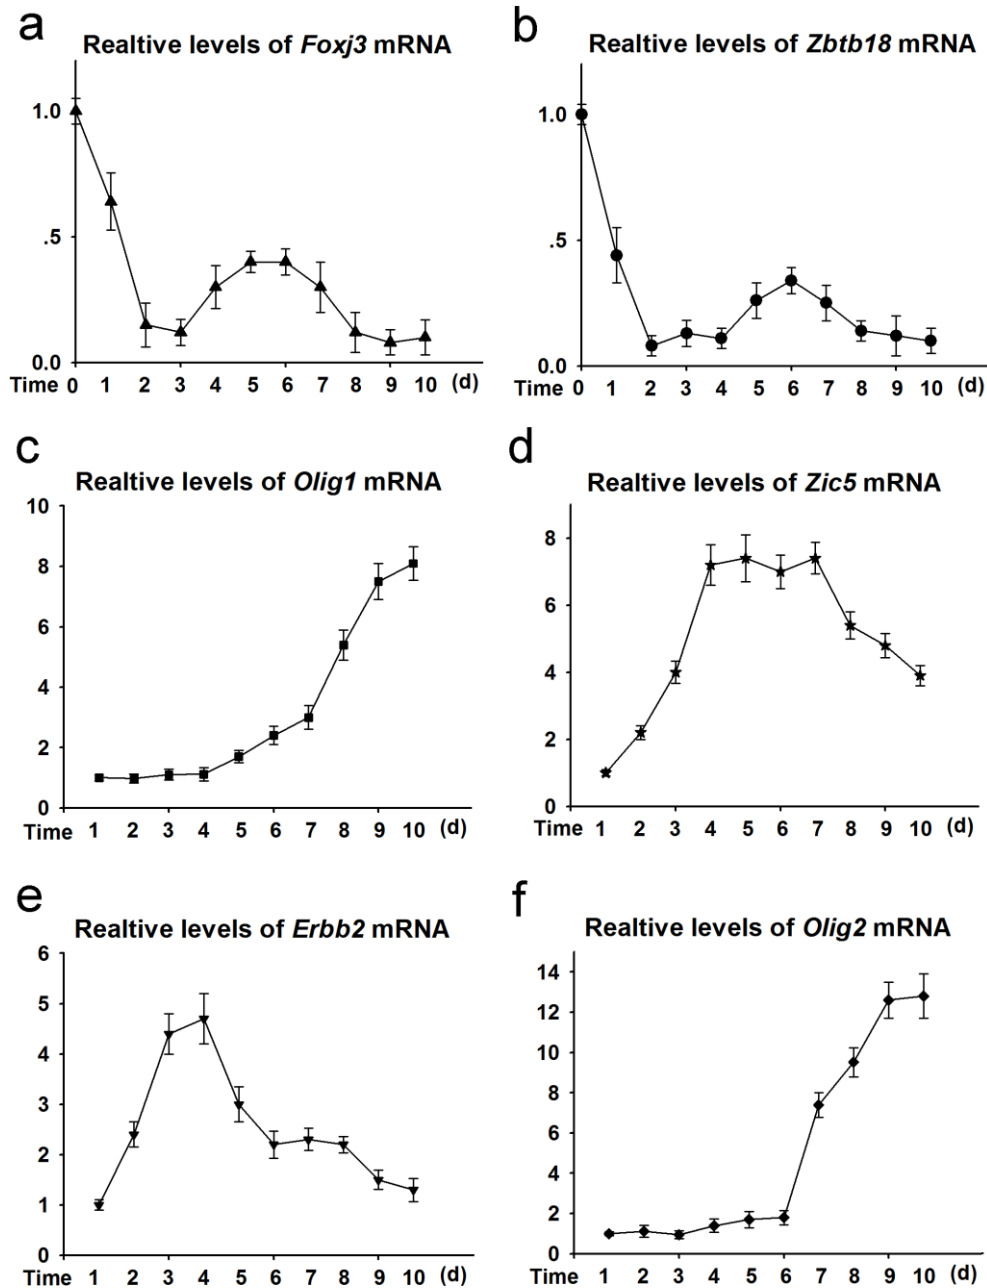

**Fig. S6 Expression patterns of *Foxj3*, *Zbtb18*, *Olig1*, *Zic5*, *Erbb2*, and *Olig2* during RA-induced neural differentiation.** mESCs were normally cultured and induced by 1  $\mu$ M RA for 10 d. Culture medium and RA were changed daily. Relative expressions of *Foxj3* (A), *Zbtb18* (B), *Olig1* (C), *Zic5* (D), *Erbb2* (E), and *Olig2* (F) during RA-induced neural differentiation were examined through qRT-PCR.

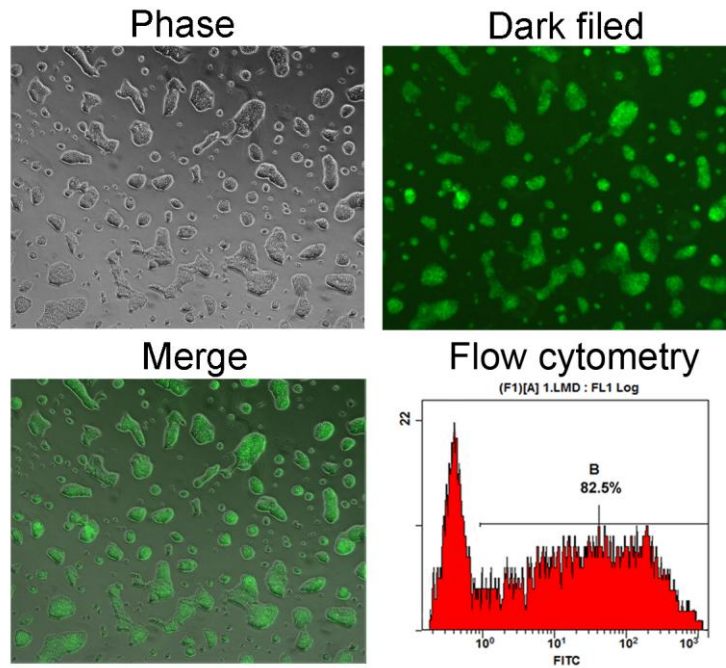

**Fig. S7 Representative result of the efficiency of plasmid transfection.**

Transfection efficiency was monitored by a backbone vector with an extra eGFP element and calculated through flow cytometry. Fluorescent photograph and flow cytometry analysis of ESCs transfected with eGFP vectors.



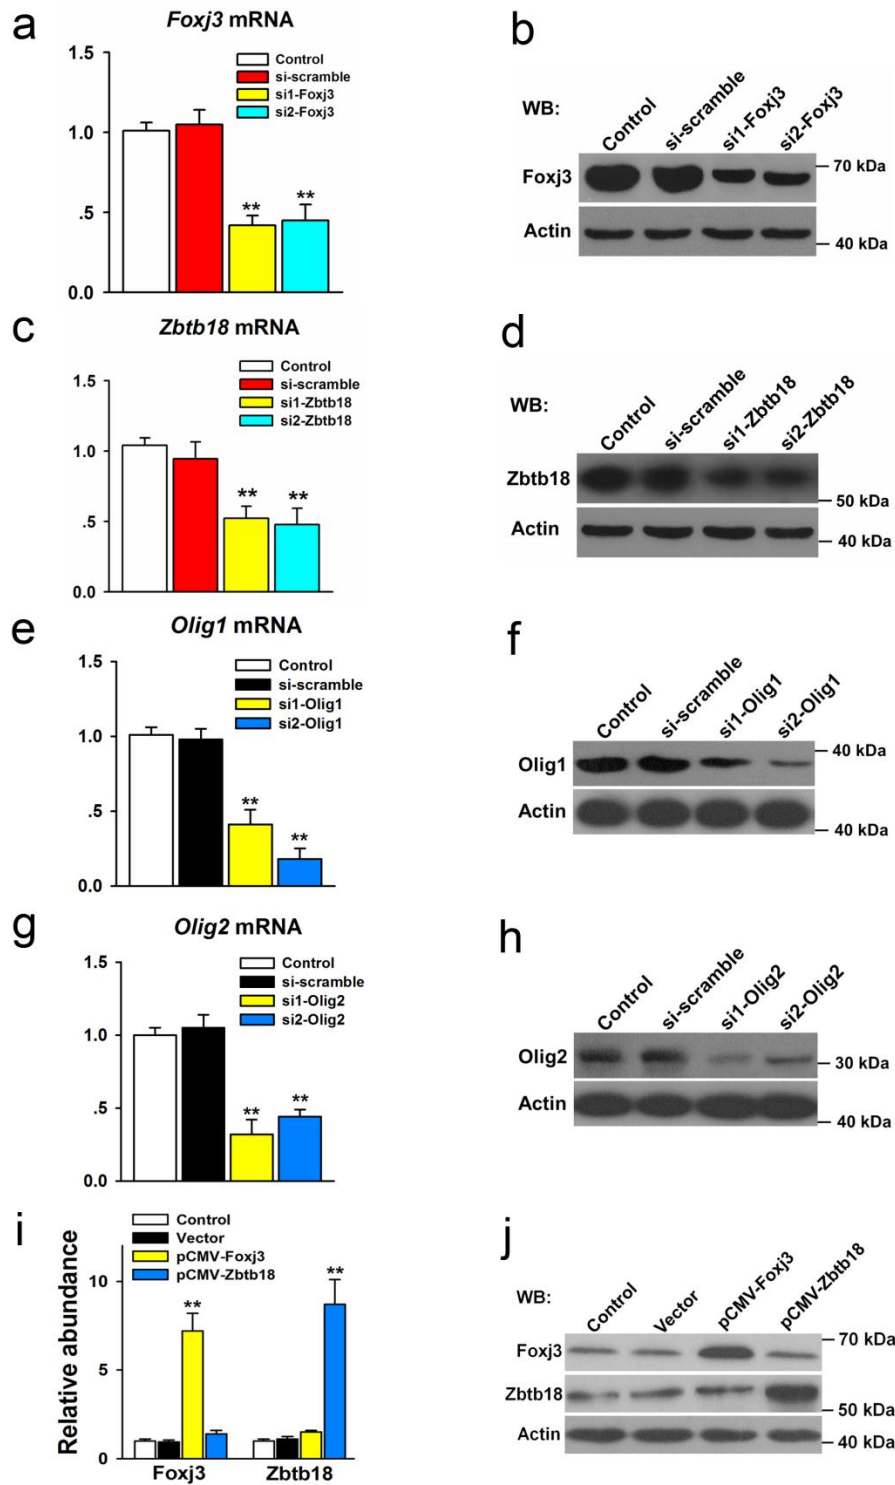

**Fig. S8 Validation of siRNAs and vectors.** (A-H): ESCs were transfected with *Foxj3*, *Zbtb18*, *Olig1*, or *Olig2* siRNAs for 48 h. Cell lysates were harvested, and qPCR and Western blot were performed to verify the efficiency of *Foxj3* (A, B), *Zbtb18* (C, D), *Olig1* (E, F), or *Olig2* (G, H) knockdowns. (I, J): Validation of pCMV-Foxj3 and pCMV-Zbtb18 plasmids by qPCR (I) and Western blot (J).

**Table S1 Microarray data of 43 upregulated miRNAs**

| miR-name          | fold-change | miR-name        | fold-change |
|-------------------|-------------|-----------------|-------------|
| mmu-miR-100-5p    | 5.19        | mmu-miR-465a-3p | 2.89        |
| mmu-miR-10a-3p    | 49.99       | mmu-miR-465a-5p | 2.19        |
| mmu-miR-10a-5p    | 38.94       | mmu-miR-465b-3p | 2.89        |
| mmu-miR-10b-5p    | 3.83        | mmu-miR-465c-3p | 2.88        |
| mmu-miR-1194      | 6.82        | mmu-miR-470-5p  | 2.62        |
| mmu-miR-135a-2-3p | 14.12       | mmu-miR-471-5p  | 6.17        |
| mmu-miR-138-5p    | 3.54        | mmu-miR-483-5p  | 5.58        |
| mmu-miR-149-5p    | 2.82        | mmu-miR-500-3p  | 2.57        |
| mmu-miR-181a-5p   | 3.31        | mmu-miR-615-3p  | 118.72      |
| mmu-miR-181b-5p   | 2.79        | mmu-miR-615-5p  | 314.87      |
| mmu-miR-188-5p    | 2.92        | mmu-miR-669f-3p | 2.23        |
| mmu-miR-216b-5p   | 154.85      | mmu-miR-741-3p  | 3.09        |
| mmu-miR-217-5p    | 1285.28     | mmu-miR-741-5p  | 4.29        |
| mmu-miR-219-2-3p  | 15.88       | mmu-miR-743a-3p | 5.11        |
| mmu-miR-219-5p    | 6.89        | mmu-miR-743b-3p | 3.57        |
| mmu-miR-224-5p    | 5.36        | mmu-miR-871-3p  | 7.99        |
| mmu-miR-335-3p    | 2.06        | mmu-miR-878-5p  | 2.39        |
| mmu-miR-335-5p    | 2.41        | mmu-miR-881-3p  | 3.28        |
| mmu-miR-344-3p    | 2.09        | mmu-miR-883a-3p | 2.57        |
| mmu-miR-344d-3p   | 10.23       | mmu-miR-883b-5p | 4.51        |
| mmu-miR-375-3p    | 2.26        | mmu-miR-99a-5p  | 27.03       |
| mmu-miR-452-5p    | 2.09        |                 |             |

**Table S2 Potential of three germ layer differentiation**

| Germ layer                       | mESC             | RA pretreated for 48 h |                      |
|----------------------------------|------------------|------------------------|----------------------|
|                                  |                  | mESC                   | Foxj3-Zbtb18<br>mESC |
| Neuronal like<br>tissue positive | <b>11(12.2%)</b> | <b>35(38.9%)</b>       | <b>5(5.56%)</b>      |
| Ectoderm                         | <b>29(32.2%)</b> | <b>47(52.2%)</b>       | <b>19(21.1%)</b>     |
| Mesoderm                         | <b>23(25.6%)</b> | <b>12(13.3%)</b>       | <b>22(24.4%)</b>     |
| Endoderm                         | <b>25(27.8%)</b> | <b>14(15.6%)</b>       | <b>26(28.9%)</b>     |

**Table S3 Verification of gene expression changes by qRT-PCR**

| Gene ID | Fold Change  |               | q-PCR of<br>miR-219<br>treated ES | Sequence of primers used in q-PCR                   |
|---------|--------------|---------------|-----------------------------------|-----------------------------------------------------|
|         | Foxj3<br>-ES | Zbtb18-<br>ES |                                   |                                                     |
| Arid1a  | 0.39         | 0.36          | 2.42                              | F:CTTCCCCAACCACCAGTACAA<br>R:CTGTGCGAAGGACGAAGAC    |
| Camk2b  | 0.35         | 0.44          | 1.74                              | F:CGTTTCACCGACGAGTACCAG<br>R:GCGTACAATGTTGGAATGCTTC |
| Chd7    | 0.44         | 0.42          | 3.07                              | F:GTGAAGCTGTGTTGAAAGGCA<br>R:CTCGGCAAAGCTCCTCTTCTG  |
| Erb2    | 0.46         | 0.48          | 2.14                              | F:ACCGACATGAAGTTGCGACTC<br>R:AGGTAAGCTCCAAATTGCCCT  |
| Glis2   | 0.30         | 0.31          | 4.26                              | F:GACGAGCCCCTCGACCTAA<br>R:AGCTCTCGATGCAAAGCATGA    |
| Gnao1   | 0.26         | 0.15          | 7.20                              | F:TGCACGAGTCTCTCATGCTCT<br>R:AGATGGTCAAGGGTGACTTCT  |
| Id2     | 2.16         | 2.97          | 0.34                              | F:ATGAAAGCCTTCAGTCCGGTG<br>R:AGCAGACTCATCGGGTCGT    |
| Ina     | 0.49         | 0.37          | 3.51                              | F:GCGCAGTATGAGTCCCTGG<br>R:CGGTACTCGTGGATCTCCTCT    |
| Map1s   | 0.37         | 0.33          | 2.67                              | F:GAGTTGGAACGAGGTGTTTCG<br>R:TCACAATGCTGGAGAAGGTG   |
| Ndn     | 0.45         | 0.39          | 1.43                              | F:GAGGTCCCCGACTGTGAGAT<br>R:TGCAGGATTTTAGGGTCAACATC |
| Numbl   | 0.46         | 0.42          | 1.94                              | F:GCAGGCACCATGAACAAGTTA<br>R:TCTTCACAAACGTGCATTCCC  |
| Olig1   | 0.38         | 0.30          | 3.87                              | F:TCTTCCACCGCATCCCTTCT<br>R:CCGAGTAGGGTAGGATAACTTC  |
| Olig2   | 0.44         | 0.23          | 5.61                              | F:TCCCCAGAACCCGATGATCTT<br>R:CGTGGACGAGGACACAGTC    |
| Shank1  | 0.39         | 0.26          | 3.37                              | F:TGCATCAGACGAAATGCCTAC<br>R:AACAGTCCATAGTTCAGCACG  |
| Smardc3 | 0.39         | 0.23          | 3.16                              | F:CCCGAGTCCCAGGCTTACA<br>R:GCTTTCGCTTTTGCTTCATGG    |
| Zic2    | 0.33         | 0.42          | 2.16                              | F:CAAGGTCCGGGTGCTTACC<br>R:ATTAAAGGGAGGCCCCGAATA    |
| Zic5    | 0.42         | 0.33          | 2.54                              | F:GCAGCCACGTCTGCTTTTG<br>R:TATGAGTGCGCTTGTGGATCT    |

Table S4 Sequences of primers for Foxj3 and Zbtb18

| Primer name    | Primer sequence(5'-3')                | Accession Number |
|----------------|---------------------------------------|------------------|
| Foxj3 -F-NheI  | ATTCTGCTAGCGCCACCATGGGTTTGTATGGACAAG  | NM_172699.3      |
| Foxj3 -R-BamHI | CGCAGGATCCCACACTATTGAATCCCAATCAAAGTC  |                  |
| Zbtb18-F-BamHI | TTAAGGATCCGCCACCATGTGTCCTAAAGGTTATGAA | NM_001012330.1   |
| Zbtb18-R-BamHI | GCTAGGATCCTTTCCAAAGTTCTTGAGAGCTATCT   |                  |

Restriction sites were underlined. Kozak sequence (bold fonts) were included for optimal translation according to manufacturer's instructions.

Table S5 Sequences of primers for 3'UTR\* of Foxj3 and Zbtb18

| Primer name        | Primer sequence(5'-3')                         |
|--------------------|------------------------------------------------|
| WT <sup>#</sup> -F | CCAGGATGACTTTGATTGGGA                          |
| WT-R               | AGCCTCTGTATCTTGCTGCCTA                         |
| Foxj3              | Site1 mut <sup>§</sup> R1                      |
|                    | GAATCTCT <b><u>TGGCTCA</u></b> ATTCGAAAGGAATT  |
| 3'UTR              | Site1 mut F1                                   |
|                    | CTAAATTCCTTTCGAA <b><u>TGAGCCA</u></b> AGAG    |
|                    | Site2 mut R2                                   |
|                    | GGACCAATGCTTCT <b><u>TGGCTCA</u></b> TTTGTCTGT |
|                    | Site2 mut F2                                   |
|                    | CAGACAAAT <b><u>TGAGCCA</u></b> AGAAGCATTGGTCC |
|                    | WT-F                                           |
|                    | GCCAGCTCAGAGTTTAGGT                            |
|                    | WT-R                                           |
|                    | TTATTGCAGTTAGCACACAGT                          |
| Zbtb18             | Site1 mut R1                                   |
|                    | CCACAGACATT <b><u>TGGCTCA</u></b> TCCTCTAG     |
| 3'UTR              | Site1 mut F1                                   |
|                    | AGGAT <b><u>TGAGCCA</u></b> AAATGTCTGTGGAAG    |
|                    | Site2 mut R2                                   |
|                    | CATACTAT <b><u>TGGCTCA</u></b> AAAGCTAGATG     |
|                    | Site2 mut F2                                   |
|                    | CTGACATCTAGCTTT <b><u>TGAGCCA</u></b> AATAGT   |

Mutations were underlined and showed in bold fonts.

\* untranslated region

# wild type

§ mutation

**Table S6 Sequences of primers for mRNA quantitation**

| Gene   | Primer name | Sequence (5'—3')        | Product length |
|--------|-------------|-------------------------|----------------|
| Foxj3  | F           | AGCCTAACATCTATGGACTGGT  | 118 bp         |
|        | R           | GGTCAAGGAGTGCATTCTTCTTA |                |
| Zbtb18 | F           | GTTCCGATAAAGTCGAGAGCC   | 114 bp         |
|        | R           | CCCTTTTGCTGGGTAGAATGT   |                |
| Oct4   | F           | CGGAAGAGAAAGCGAACTAGC   | 108 bp         |
|        | R           | ATTGGCGATGTGAGTGATCTG   |                |
| Nestin | F           | CCCTGAAGTCGAGGAGCTG     | 166 bp         |
|        | R           | CTGCTGCACCTCTAAGCGA     |                |
| Map2   | F           | GCCAGCCTCGGAACAAACA     | 101 bp         |
|        | R           | GCTCAGCGAATGAGGAAGGA    |                |
| Olig1  | F           | TCTTCCACCGCATCCCTTCT    | 226 bp         |
|        | R           | CCGAGTAGGGTAGGATAACTTC  |                |
| Zic5   | F           | GCAGCCACGTCTGCTTTTG     | 180 bp         |
|        | R           | TATGAGTGCGCTTGTGGATCT   |                |
| Erbp2  | F           | ACCGACATGAAGTTGCGACTC   | 106 bp         |
|        | R           | AGGTAAGCTCCAAATTGCCCT   |                |
| Olig2  | F           | TCCCCAGAACCCGATGATCTT   | 90 bp          |
|        | R           | CGTGGACGAGGACACAGTC     |                |
| Actin  | F           | GGCTGTATTCCCCTCCATCG    | 154 bp         |
|        | R           | CCAGTTGGTAACAATGCCATGT  |                |

**Table S7 Sequences of primers for microRNA quantitation\***

| microRNA  | Sequence (5'—3')          |
|-----------|---------------------------|
| 217-5P    | TACTGCATCAGGAACTGACTGGA   |
| 615-5P    | GTCCCCGGTGCTCGGAT         |
| 216b-5p   | GAAATCTCTGCAGGCAAATGTG    |
| 615-3p    | GAGCCTGGGTCTCCCTCTT       |
| 10a-3p    | GCAAATTCGTATCTAGGGGAATA   |
| 10a-5p    | TACCCTGTAGATCCGAATTTGTG   |
| 135a-2-3p | TGTAGGGATGGAAGCCATGAA     |
| 219-2-3p  | AGAATTGTGGCTGGACATCTGT    |
| 344d-3p   | GGATATAACCACTGCCAGACTGA   |
| 99a-5p    | AACCCGTAGATCCGATCTTGTG    |
| 100-5p    | AACCCGTAGATCCGAACTTGTG    |
| 1194      | GGGAATGAGTAACTGCTAGATCCT  |
| 219-5p    | TGATTGTCCAAACGCAATTCT     |
| 224-5p    | GGTAAGTCACTAGTGGTTCCGTT   |
| 471-5p    | GGGTACGTAGTATAGTGCTTTTCAC |
| 483-5p    | AAGACGGGAGAAGAGAAGGGAG    |
| 743a-3p   | GGAAAGACACCAAGCTGAGTAGA   |
| 871-3p    | TGACTGGCACCATTCTGGATAAT   |
| 470-5p    | TTCTTGGACTIONGGCACTGGTGA  |
| 145b      | GGTCCAGTTTTCCCAGGAGACT    |
| 145a-5p   | TCCAGTTTTCCCAGGAATCCCT    |
| 134-3p    | CTGTGGGCCACCTAGTCACC      |
| 296-3p    | GAGGGTTGGGTGGAGGCTC       |

\*The reverse primer was 10× miScript Universal Primer provided in miScript II RT Kit (Qiagen)
